# Supplementary material for: Dissecting the Molecular Mechanism of Ionizing Radiation-Induced Tissue Damage in the Feather Follicle
Source: PLOS journal article supplement (doi:10.1371/journal.pone.0089234), 2014-02-20
Supplement: S4 (10.1371/journal.pone.0089234.s004) [file journal.pone.0089234.s004]

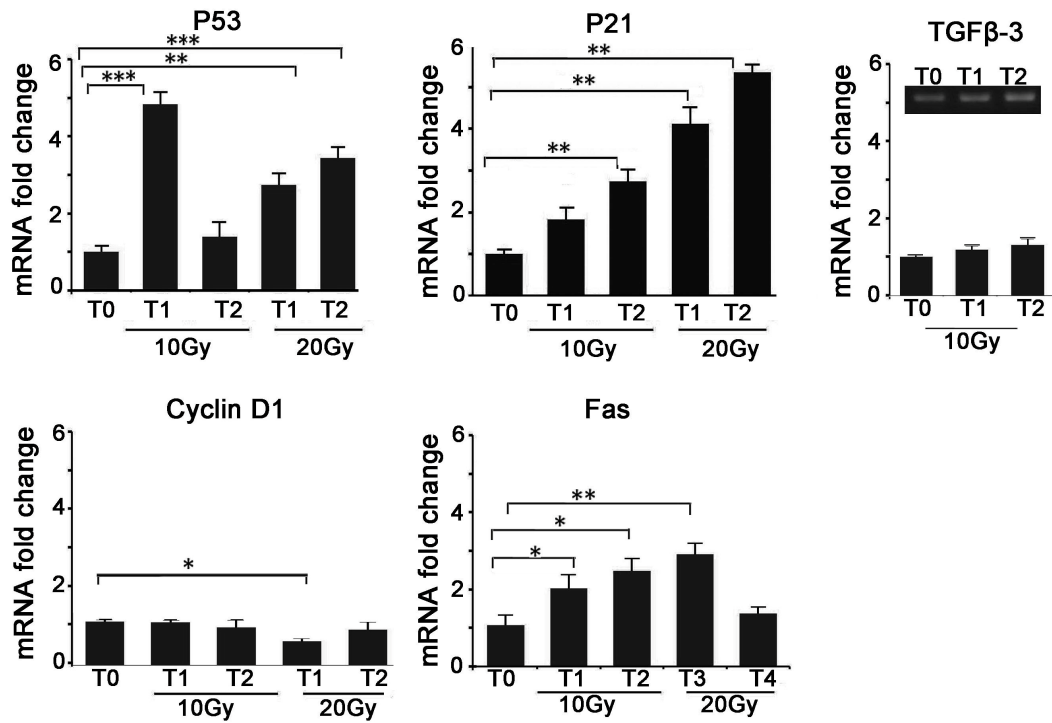

**Figure S4. Quantification of molecular expression in the feather follicles.**

RT-PCR analysis of gene expression in the feather follicles were densitometrically quantified (for P53/P21/Cyclin D1/Fas gene, gels were shown in Fig. 3D) and statistically analyzed. \*,  $p < 0.05$ ; \*\*,  $p < 0.01$ ; \*\*\*,  $p < 0.001$ . T0, untreated control; T1, 1 day post-IR; T2, 2 days post-IR.
